# Supplementary figures and images for: Defining rehabilitation: An exploration of why it is attempted, and why it will always fail
Source: PubMed Central journal article supplement — Clin Rehabil. 2021 Jun 28;35(12):1650–6. doi: 10.1177/02692155211028018 (PMC8552408; doi:10.1177/02692155211028018), 2021-06-28

Figure two

Rehabilitation - the many and various meanings

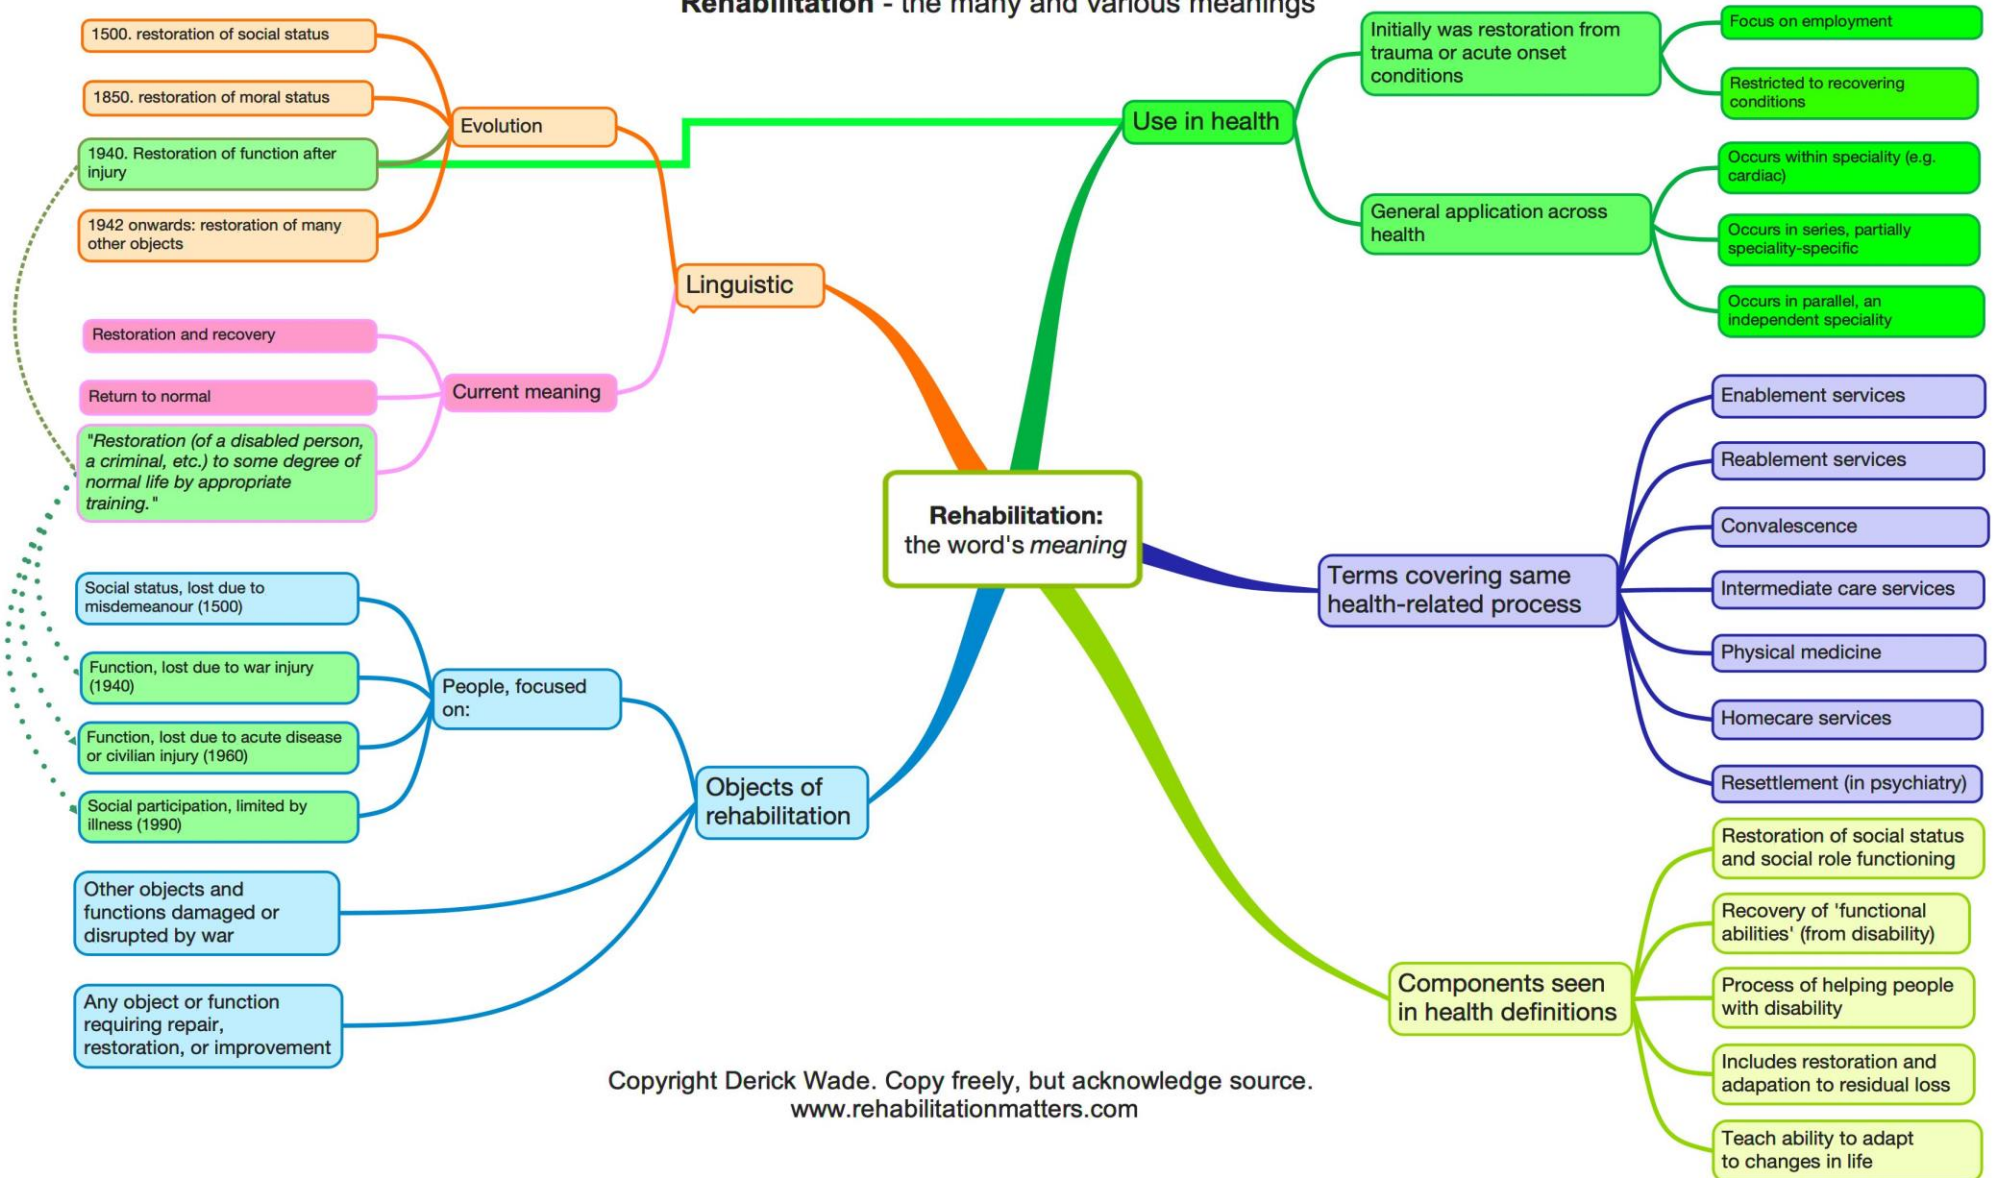

Supplement: sj-pdf-2-cre-10.1177_02692155211028018.pdf [file sj-pdf-2-cre-10.1177_02692155211028018.pdf]
